# Supplementary material
Source: Royal Society of Chemistry journal article supplement (doi:10.1039/d6ta01442a)
Supplement: d6ta01442a1.pdf [file d6ta01442a1.pdf]

## Supporting Information

### **Structural Incommensurability Drives Ultralow Lattice Thermal Conductivity in Misfit Layered (BiSe)<sub>1.23</sub>CrSe<sub>2</sub>**

Anil Kumar B. M.,<sup>a</sup> Shuva Biswas,<sup>b</sup> Sambit Jena,<sup>c</sup> Pranav Negi,<sup>d</sup> Dirtha Sanyal,<sup>e,f</sup>

Banasree Sadhukhan<sup>c</sup> and Satya N. Guin<sup>\*a</sup>

<sup>a</sup>*Department of Chemistry, Birla Institute of Technology and Science Pilani, Hyderabad Campus, Jawahar Nagar, Hyderabad 500078, India*

<sup>b</sup>*New Chemistry Unit, Jawaharlal Nehru Centre for Advanced Scientific Research (JNCASR), Jakkur P.O., Bengaluru 560064, India*

<sup>c</sup>*Department of Physics, Ecole Centrale School of Engineering, Mahindra University, Hyderabad 500043, India*

<sup>d</sup>*Department of Chemistry, Indian Institute of Science Education and Research Bhopal, Bhopal 462066, India*

<sup>e</sup>*Variable Energy Cyclotron Centre, 1/AF Bidhannagar, Kolkata 700064, India*

<sup>f</sup>*Homi Bhabha National Institute, Training School Complex, Anushakti Nagar, Mumbai 400094, India*

\*Email: [satyanarayan.g@hyderabad.bits-pilani.ac.in](mailto:satyanarayan.g@hyderabad.bits-pilani.ac.in)

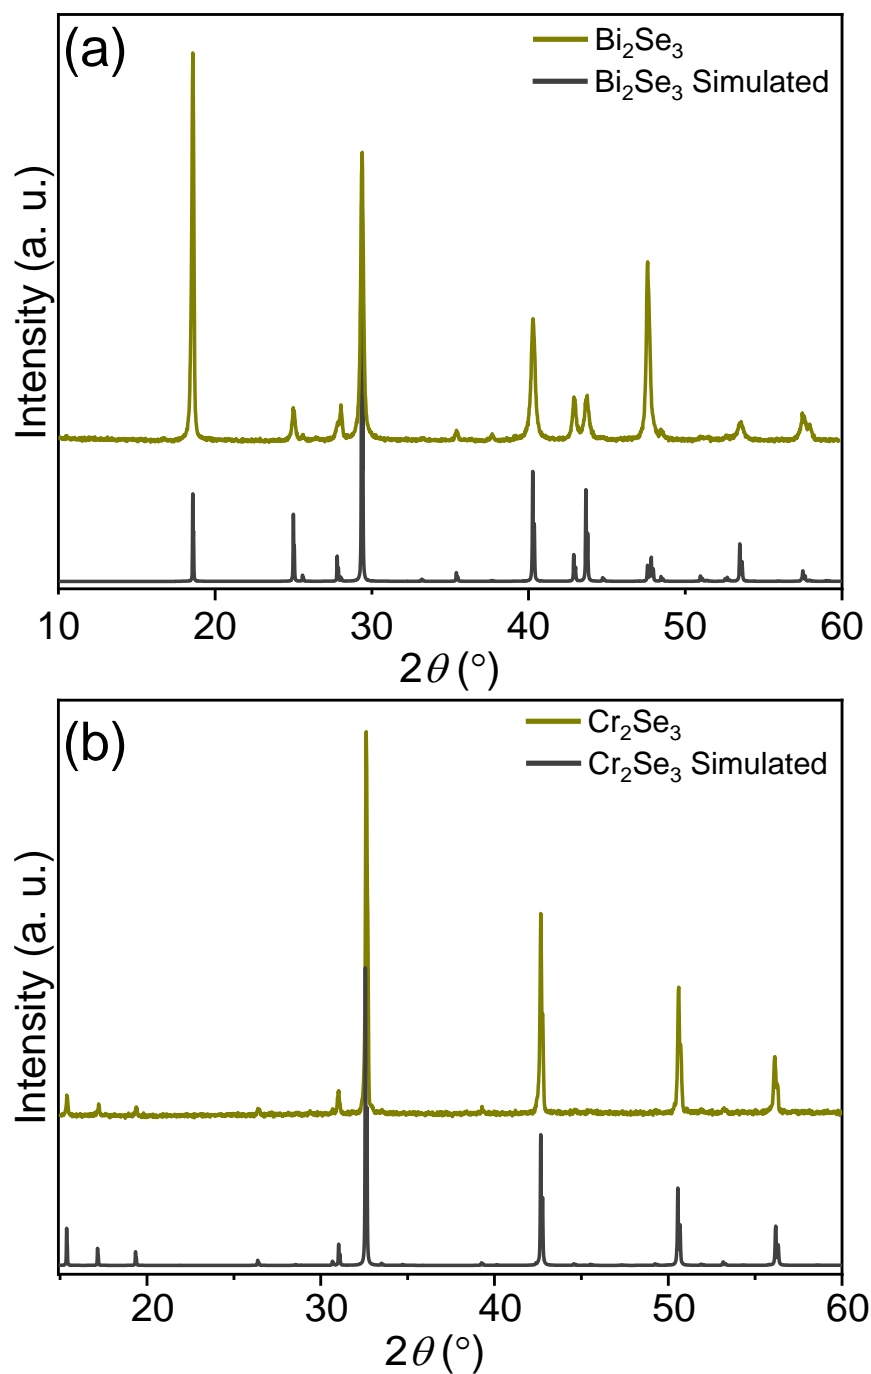

**Fig. S1** Room temperature PXRD pattern of (a)  $\text{Bi}_2\text{Se}_3$  and (b)  $\text{Cr}_2\text{Se}_3$  plotted with the simulated patterns (COD: 00-901-1965 and COD: 00-152-7062), respectively, showing the phase purity binary mixtures used to synthesise  $(\text{BiSe})_{1.23}\text{CrSe}_2$  as described by Clarke et.al.<sup>1</sup>

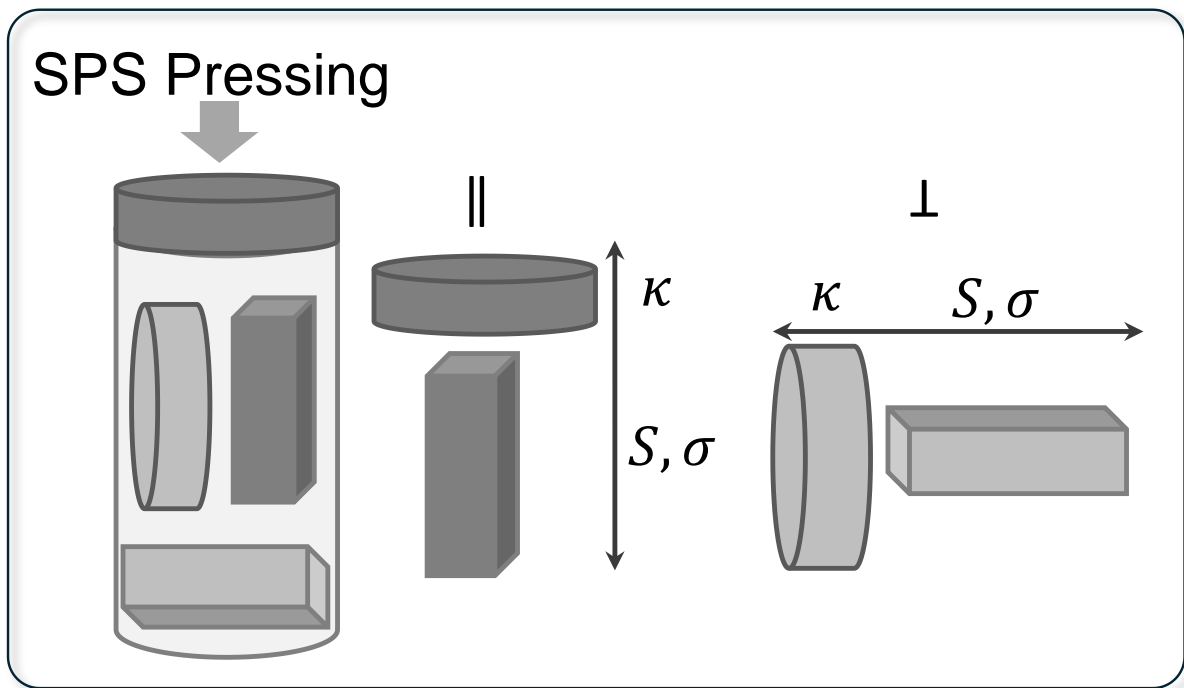

**Fig. S2** A schematic illustrating the preparation of standard bars and coins from the SPS'ed sample for measuring thermal and electrical transport properties, both parallel and perpendicular to the SPS pressing direction.

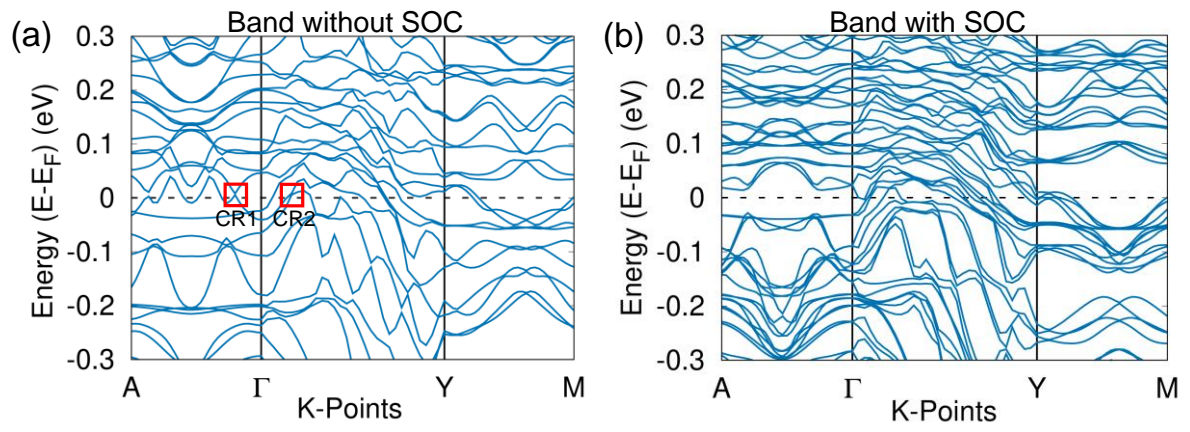

**Fig. S3** Band structures (a) without, (b) with spin-orbit coupling (SOC) of  $(\text{BiSe})_{1.23}\text{CrSe}_2$ .

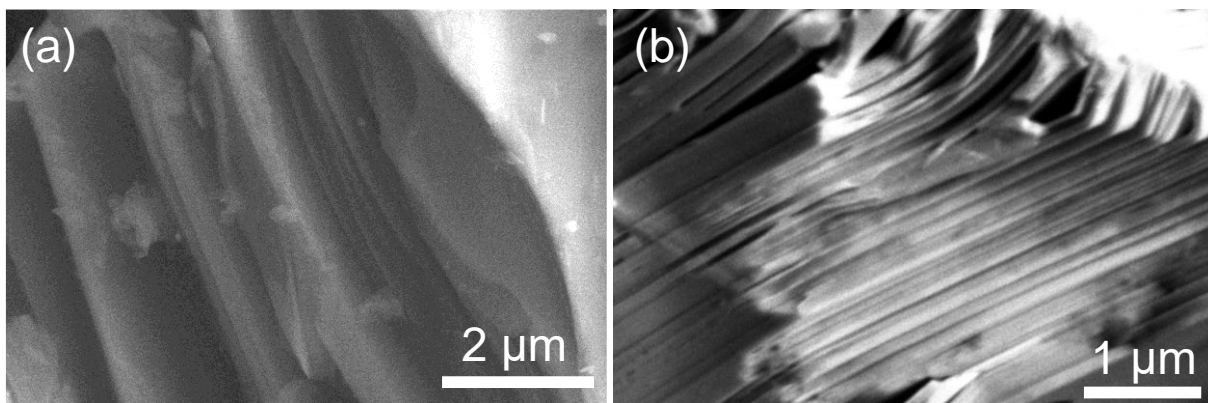

**Fig. S4** (a) and (b) FE-SEM images of  $(\text{BiSe})_{1.23}\text{CrSe}_2$  MLC taken in back scattered mode (BSE) showing no distinct contrast differences.

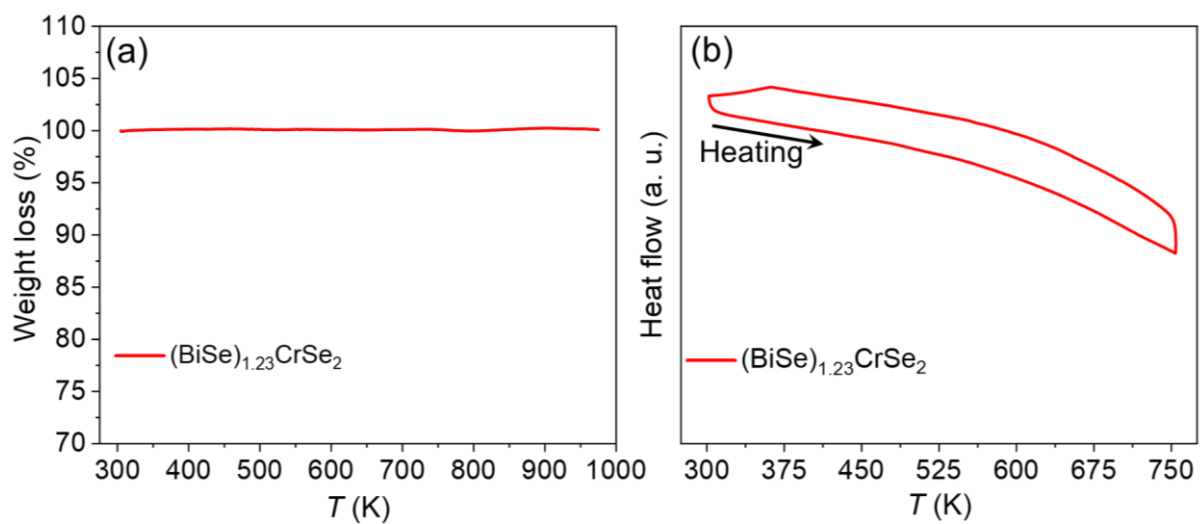

**Fig. S5** (a) and (b) present the TGA and DSC curves, respectively, showing thermal stability of the  $(\text{BiSe})_{1.23}\text{CrSe}_2$  misfit layered compound (MLC).

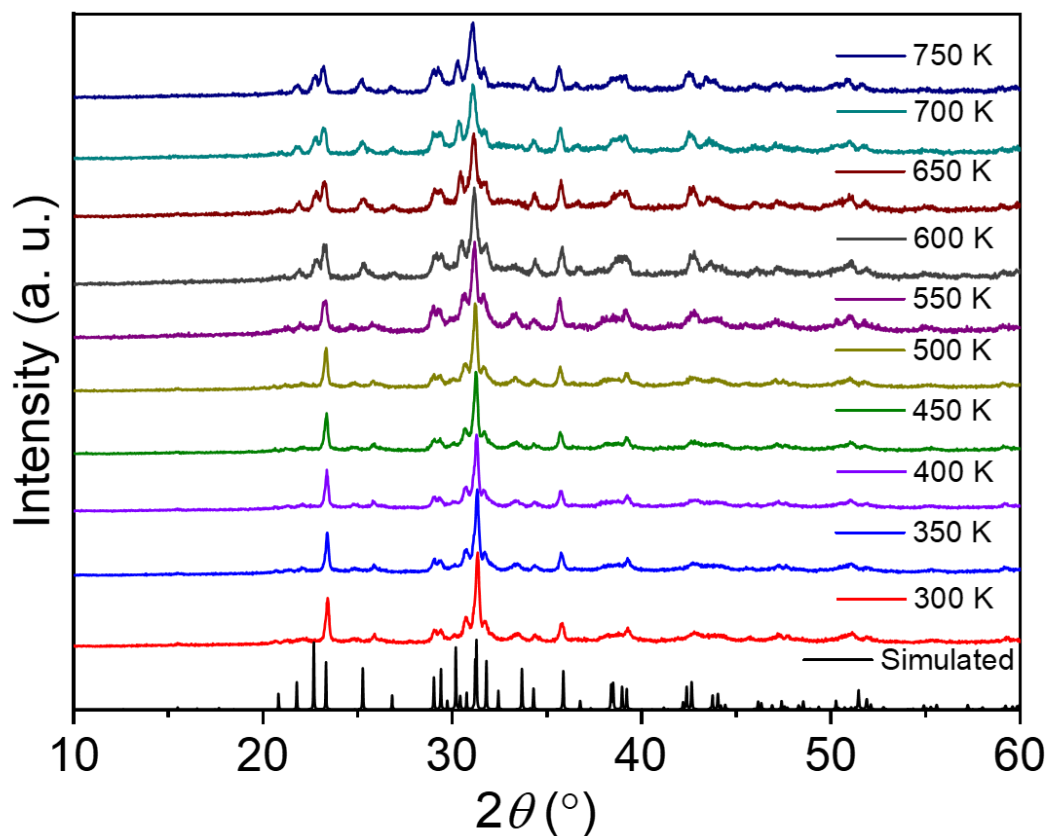

**Fig. S6** Temperature dependence of (BiSe)<sub>1.23</sub>CrSe<sub>2</sub> MLCs' PXRD pattern with the simulated pattern showing stability of the material at elevated temperatures, which is in good agreement with the observations from TGA and DSC.

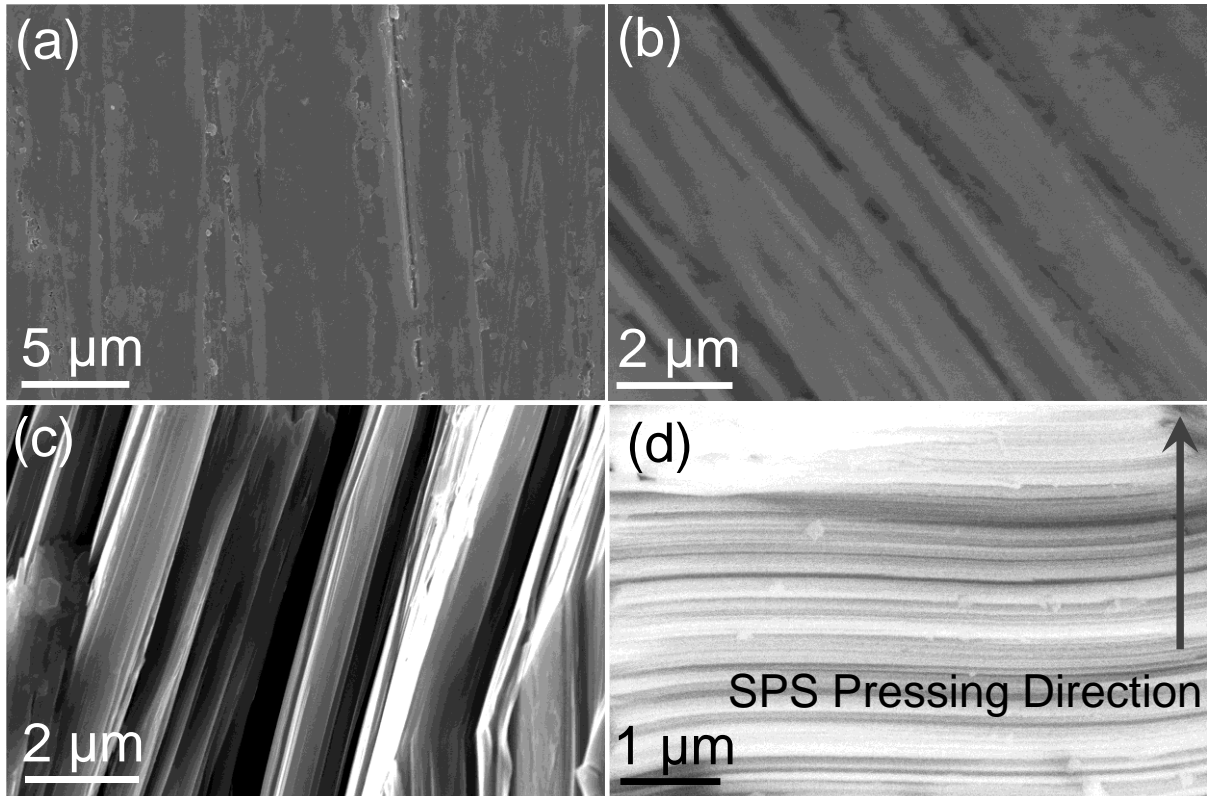

**Fig. S7** a) Typical FESEM micrograph of the polished pellet, b) FESEM micrograph of the pellet recorded in backscattered electron mode corroborates the retention of single phase, and (c-d) FESEM micrographs of the cracked surface recorded in secondary and backscattered electron modes, respectively, showing the layered nature.

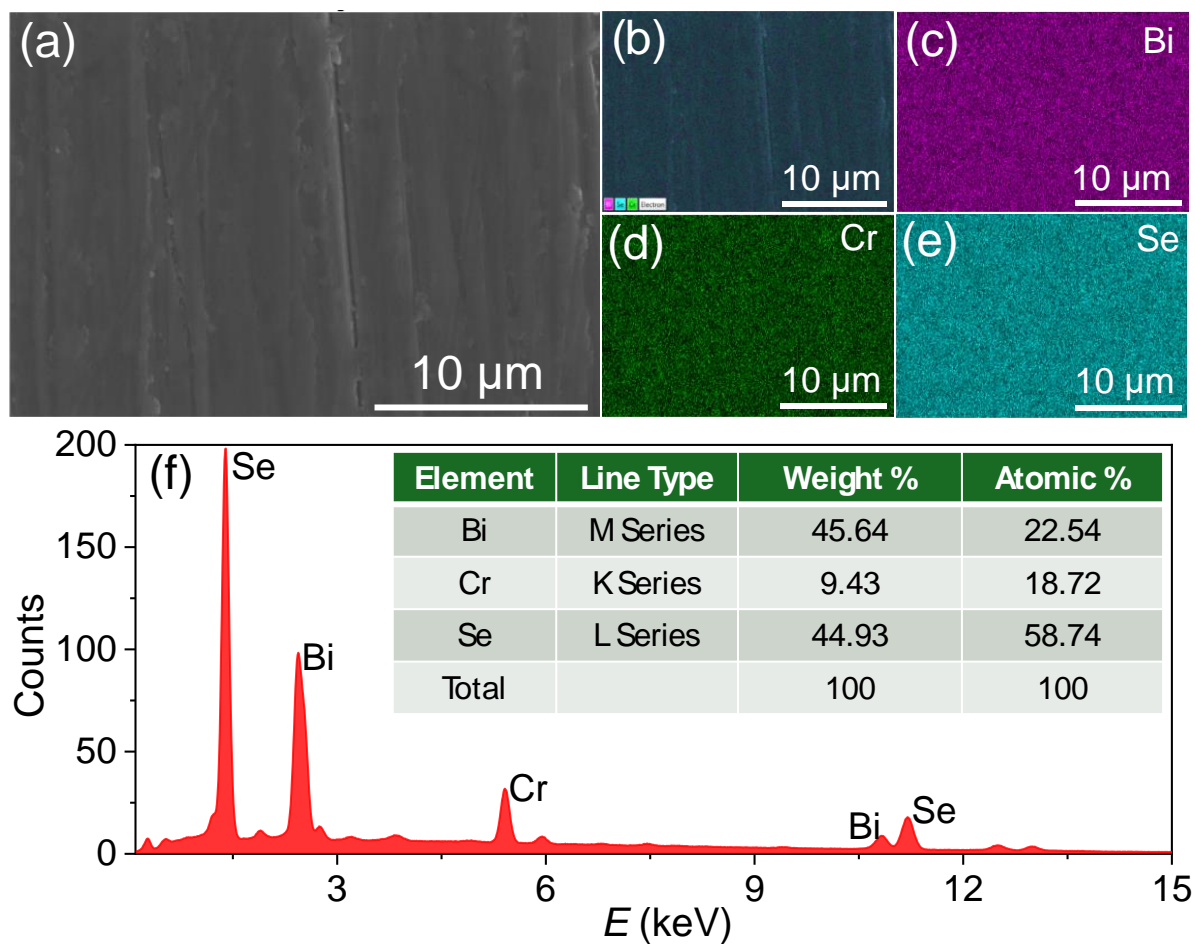

**Fig. S8** (a) FESEM micrograph of the polished pellet selected for the Energy Dispersive X-ray Spectroscopy (EDS), (b-e) EDS elemental mapping showing the uniform distribution of the constituent elements, and (f) the corresponding EDS spectrum, insert showing the quantified elemental composition.

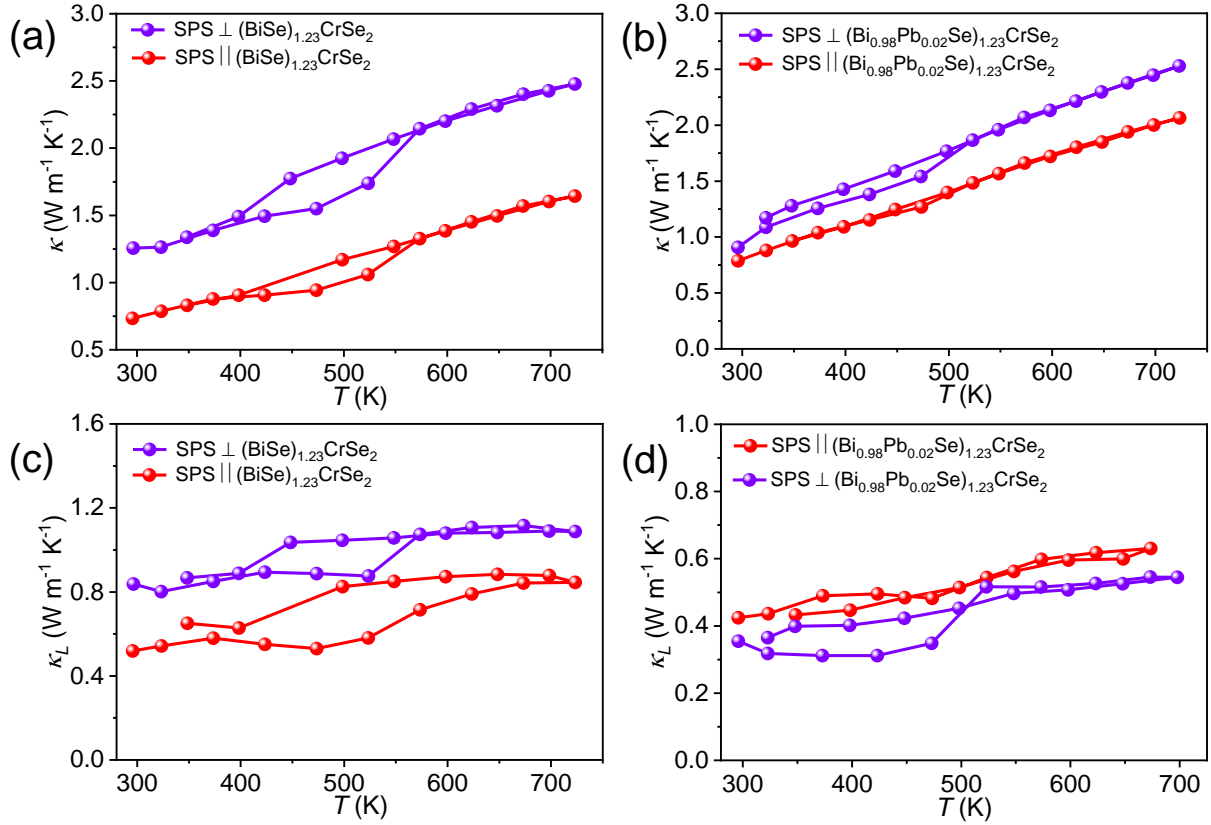

**Fig. S9** Temperature dependent behaviour during heating-cooling cycles for (a) total thermal conductivity ( $\kappa$ ) and (c) lattice thermal conductivity ( $\kappa_L$ ) of the pristine  $(\text{BiSe})_{1.23}\text{CrSe}_2$ , measured parallel and perpendicular to the SPS pressing direction, showing a pronounced hysteresis between 400 to 570 K. Upon 2% Pb-doping, a significant decrease in the hysteresis is seen  $\kappa$  (b) and  $\kappa_L$  (d).

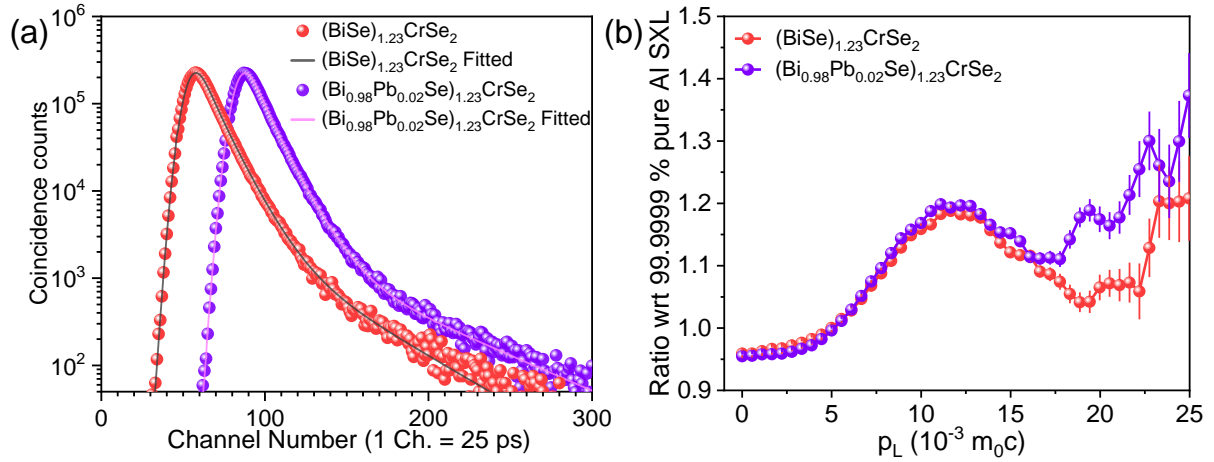

**Fig. S10** (a) Room-temperature positron lifetime spectra of pristine and Pb-doped  $(\text{BiSe})_{1.23}\text{CrSe}_2$ . The solid lines represent fits used to determine the positron lifetime components. (b) The area normalised point by point ratio between the CDB spectra of pristine and Pb-doped  $(\text{BiSe})_{1.23}\text{CrSe}_2$  with the CDB spectra of defect-free 99.9999 % pure aluminium.

Positron studies can provide insight into defects and are helpful in understanding the role of defects in transport. The positron annihilation lifetime spectrum (Figure S10a) of the Pristine and Pb-doped samples has been best fitted (using PATFIT 88 computer code) with three lifetime components. Table S1 presents the various lifetime components and their corresponding intensities. The source component measured with a pure aluminium and pure silicon sample has been well taken care of during the extraction of lifetime components. It shows a very long lifetime component of 996 ps to 1341 ps with an intensity of 3 %. This is a common phenomenon in polycrystalline samples. The origin of such a long component is the pick-off annihilation process, i.e., a positron initially forms an ortho-positronium (spin triplet state) with an electron and subsequently decays with another electron with opposite spin as para-positronium (spin singlet state). The intermediate lifetime component ( $\tau_2$ ) represents the lifetime of the positrons annihilating in a cation defect site. The value of the intermediate lifetime component has been increased from  $288 \pm 4$  ps to  $303 \pm 5$  ps, but its intensity ( $I_2$ ) decreases from 78 % to 69 % due to the doping of Pb at the Bi site in  $(\text{BiSe})_{1.23}\text{CrSe}_2$ . The present experimental result suggests the reduction of cation vacancy in the  $(\text{BiSe})_{1.23}\text{CrSe}_2$  due to the doping of lead. The shortest lifetime component,  $\tau_1$ , is the free annihilation of positron at the bulk of the sample, which is also increased from  $141 \pm 3$  to  $159 \pm 4$  ps.

**Table S1** Different lifetime components and their intensities.

| Sample                                                                       | $\tau_1$ (ps) | $I_1$ (%) | $\tau_2$ (ps) | $I_2$ (%) | $\tau_3$ (ps) | $I_3$ (%) |
|------------------------------------------------------------------------------|---------------|-----------|---------------|-----------|---------------|-----------|
| (Bi <sub>0.98</sub> Pb <sub>0.02</sub> Se) <sub>1.23</sub> CrSe <sub>2</sub> | 159 ± 4       | 28 ± 2    | 303 ± 5       | 69 ± 2    | 1341 ± 30     | 3 ± 0.2   |
| (BiSe) <sub>1.23</sub> CrSe <sub>2</sub>                                     | 141 ± 3       | 19 ± 1    | 288 ± 4       | 78 ± 1    | 996 ± 30      | 3 ± 0.2   |

The coincidence Doppler broadening (CDB) spectroscopy has been employed to understand the chemical nature of the defect. The CDB data has been analysed by constructing a ratio curve. In the present case, the ratio curve has been constructed between the area-normalised CDB spectra of the (BiSe)<sub>1.23</sub>CrSe<sub>2</sub> and (Bi<sub>0.98</sub>Pb<sub>0.02</sub>Se)<sub>1.23</sub>CrSe<sub>2</sub> sample with respect to the area-normalised CDB spectra of a 99.9999 % pure aluminium sample. The coincidence Doppler broadening spectra of the (BiSe)<sub>1.23</sub>CrSe<sub>2</sub> and (Bi<sub>0.98</sub>Pb<sub>0.02</sub>Se)<sub>1.23</sub>CrSe<sub>2</sub> sample have been constructed with the CDB spectra of a defect-free 99.9999 % pure aluminium single crystal (Fig. S10b). In the figure, we find a peak around the momentum value  $12.5 \times 10^{-3} m_0c$ . In the positron annihilation process, just before annihilation, positrons are thermalised, i.e., their energy is in the order of meV, but the annihilating electrons have some kinetic energy. The kinetic energy of the electron,  $E_k$ , can be estimated using the Virial approximation<sup>2</sup> (in the atom, the expectation value of the kinetic energy of an electron,  $E_{kin}$ , is equal to the binding energy of the electron), as  $E_k = p_L^2 / 2m_0$ . Considering the momentum value of  $12.5 \times 10^{-3} m_0c$ , the corresponding kinetic energy of the electron has been calculated as 40 eV. It is also clear from Fig. S10b that the peak height increases due to the doping of lead [(Bi<sub>0.98</sub>Pb<sub>0.02</sub>Se)<sub>1.23</sub>CrSe<sub>2</sub>] in (BiSe)<sub>1.23</sub>CrSe<sub>2</sub>. The 40 eV kinetic energy is very close to the 3*p* electron of chromium (Cr 3*p* ~ 42 eV).<sup>3</sup> Also, from Figure S10b, it is clearly seen that around  $19 \times 10^{-3} m_0c$  momentum value, the ratio curve for (Bi<sub>0.98</sub>Pb<sub>0.02</sub>Se)<sub>1.23</sub>CrSe<sub>2</sub> has a higher value than the (BiSe)<sub>1.23</sub>CrSe<sub>2</sub> sample. The momentum value of  $19 \times 10^{-3} m_0c$  corresponds to 92 eV, which is close to the 5*p* electron energy of Bismuth (92 eV) and 5*p* electrons of lead (83 eV). It suggests that positrons annihilate more readily with the 5*p* electrons of bismuth or lead. Thus, the present CDB ratio curve analysis, along with the positron lifetime data, suggests a reduction of cation vacancy ( $V_{Cr}$  and  $V_{Bi}$ ) in (BiSe)<sub>1.23</sub>CrSe<sub>2</sub> after doping of Pb at the bismuth site, i.e., in (Bi<sub>0.98</sub>Pb<sub>0.02</sub>Se)<sub>1.23</sub>CrSe<sub>2</sub>.

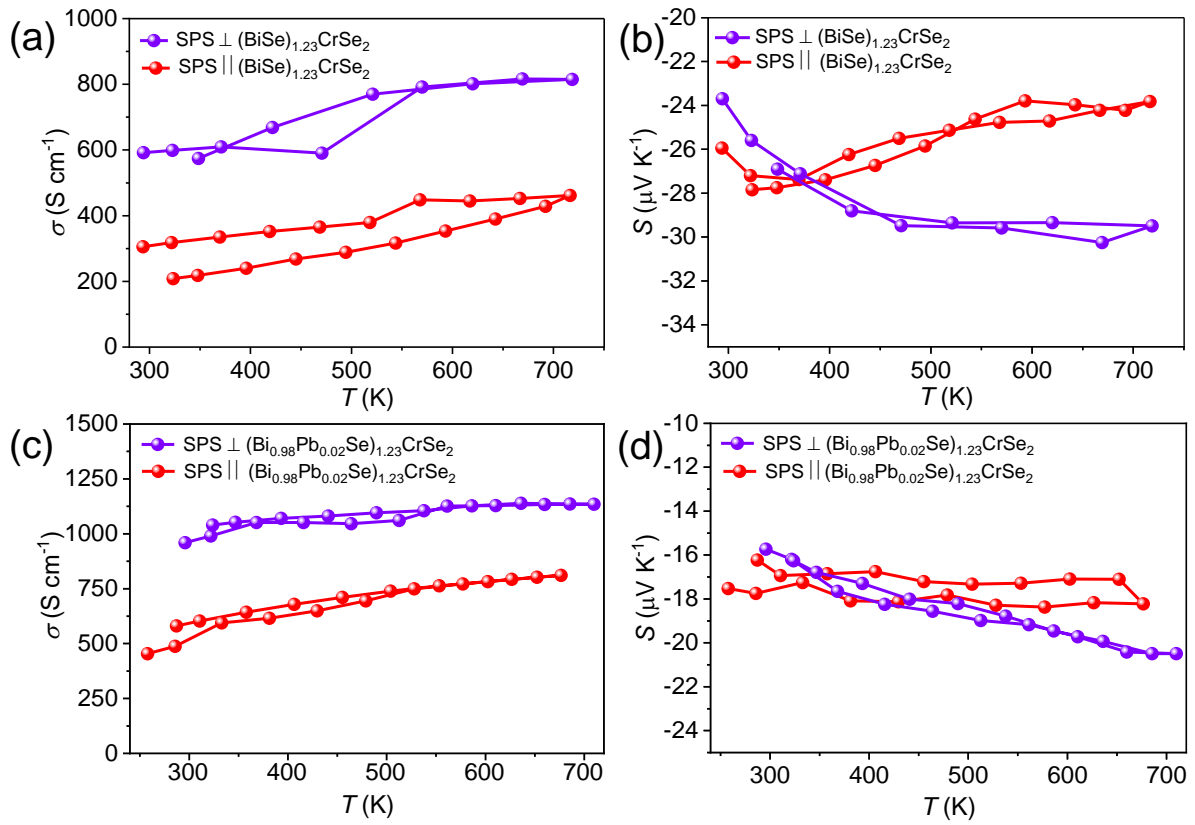

**Fig. S11** Temperature dependence of electrical conductivity ( $\sigma$ ) and Seebeck coefficient ( $S$ ) of pristine (a-b) and Pb-doped (c-d), measured parallel and perpendicular to the SPS pressing direction.

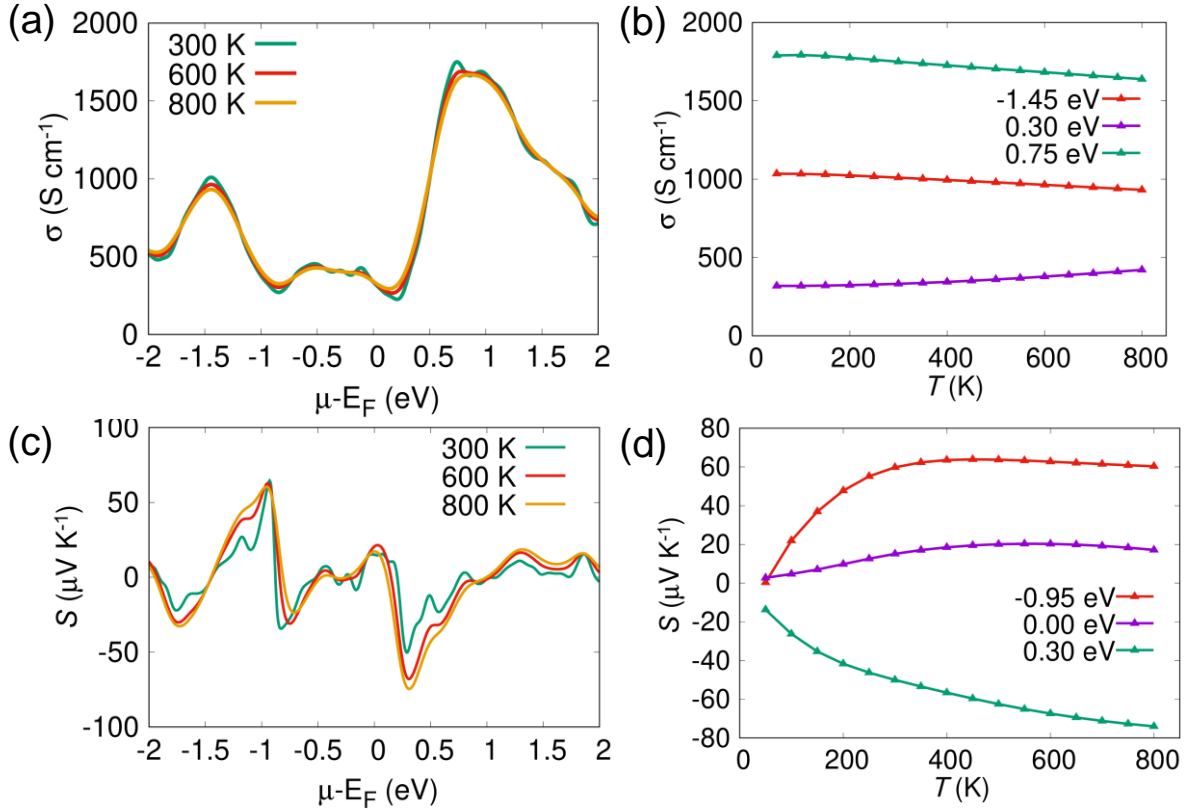

**Fig. S12** Chemical potential ( $\mu$ ) and temperature-dependent (a)-(b) electrical conductivities ( $\sigma$ ) and (c)-(d) Seebeck coefficient ( $S$ ) in  $(\text{BiSe})_{1.23}\text{CrSe}_2$ . Here, the Fermi level is denoted by  $E_F$ .

Theoretical analysis of the electrical transport properties of  $(\text{BiSe})_{1.23}\text{CrSe}_2$ , specifically electrical conductivity and Seebeck coefficient, has been performed to interpret the experimentally observed thermoelectric response. Figure S12(a)-(d) shows theoretically estimated responses in  $(\text{BiSe})_{1.23}\text{CrSe}_2$ . The electronic structure of  $(\text{BiSe})_{1.23}\text{CrSe}_2$  shows multiple conduction band pockets at different energies and linearly dispersing bands (Fig. S3 and Fig. 1c). Therefore, we also scan the electrical responses in  $(\text{BiSe})_{1.23}\text{CrSe}_2$  with chemical potential around the Fermi level ( $E_F$ ), as shown in Figure S12 (a) and (c), respectively. The Seebeck coefficient changes its character from  $n$  (negative) type to a  $p$  (positive) type conduction with chemical potentials ( $\mu$ ) as shown in Figure S12(d). Although the band structure of the compound shows metallic, the conductivity of the sample is much lower than that of typical metals. The electrical conductivity increases with temperature in the  $n$ -type region of  $(\text{BiSe})_{1.23}\text{CrSe}_2$  for  $\mu = 0.3$  eV (Figure S12b), which is consistent with experimentally observed trends (Figure S11a). Such behaviour can be attributed to the contribution from a thermally activated semiconducting transport mechanism. At low temperatures, a significant fraction of donor states and Cr-3d localised states remain un-ionised, resulting in a limited

population of mobile electrons. As the temperature rises, thermal energy progressively ionises these donor levels and promotes electrons from localised states into extended conduction-band states, thereby increasing the carrier concentration. Rising temperature also weakens the localisation induced by the misfit-layered structure and Cr-3d magnetic interactions. This enables electrons to transit more easily into extended states, which also increases electronic population in band pockets and improves hopping or band-like transport. Together, these effects result in a monotonic increase in conductivity with temperature, consistent with n-type semiconductor behaviour.

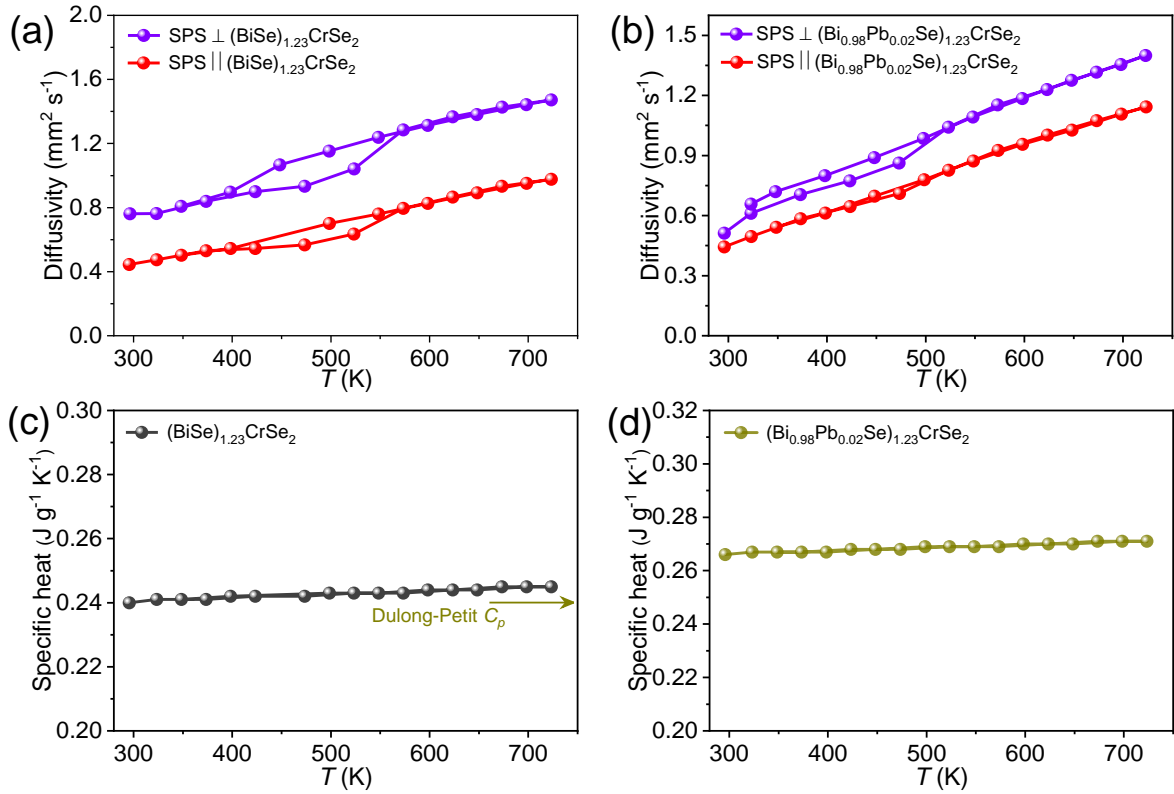

**Fig. S13** Temperature dependence of thermal diffusivity of pristine (a) and Pb-doped (b), measured parallel and perpendicular to the SPS pressing direction, along with the temperature dependence of specific heat for pristine (c) and Pb-doped (d) samples. The specific heat estimated from the Dulong–Petit limit is  $\sim 0.24 \text{ J g}^{-1} \text{ K}^{-1}$ .

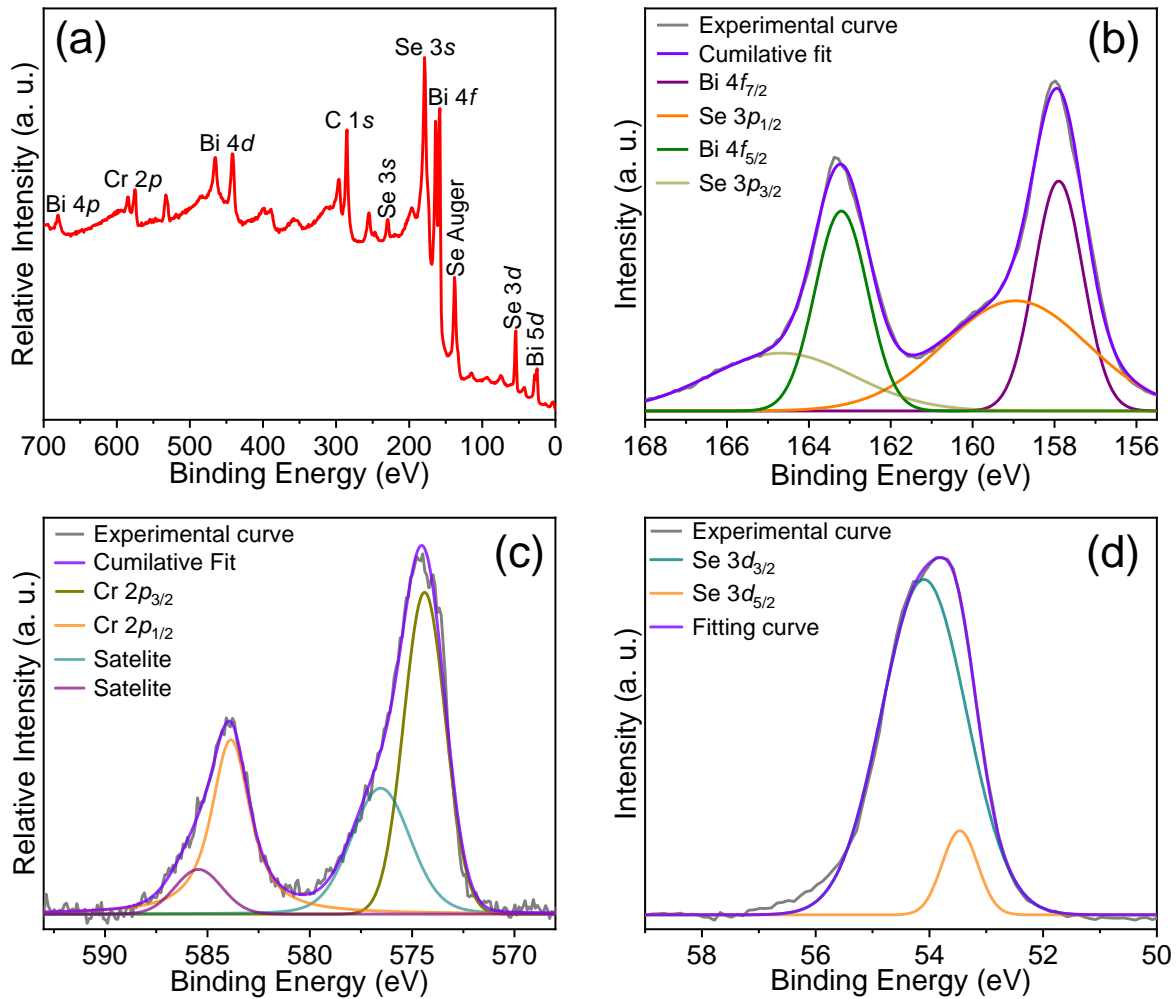

**Fig. S14** X-ray photoelectron spectroscopy (XPS) analysis of as-synthesised  $(\text{BiSe})_{1.23}\text{CrSe}_2$ : (a) Survey spectrum. (b) High-resolution Bi 4f spectrum, showing two distinct peaks at binding energies of 157.89 eV and 163.20 eV with a splitting of 5.31 eV, corresponding to the spin-orbit coupled Bi 4f<sub>7/2</sub> and Bi 4f<sub>5/2</sub>, respectively. (c) High-resolution Cr 2p spectrum, revealing two peaks at 574.38 eV and 583.85 eV (separation 9.47 eV), assigned to Cr 2p<sub>3/2</sub> and Cr 2p<sub>1/2</sub>, with satellite peaks arising from electronic contributions.<sup>4</sup> (d) High-resolution Se spectrum, displaying two peaks at 54.09 eV and 53.46 eV, corresponding to Se 3d<sub>3/2</sub> and Se 3d<sub>5/2</sub>. The measured binding energies are in excellent agreement with XPS studies of single-crystalline  $(\text{BiSe})_{1.23}\text{CrSe}_2$ .<sup>1</sup> All peaks were fitted using a Gaussian model, yielding excellent goodness-of-fit ( $R^2$ ) values of 0.9974 (Bi), 0.9912 (Cr), and 0.9976 (Se).

**Table S2** Measured sound velocities and the derived parameters of  $(\text{BiSe})_{1.23}\text{CrSe}_2$ : minimum thermal conductivity ( $\kappa_{min}$ ), diffusion thermal conductivity ( $\kappa_{diff}$ ), Poisson ratio ( $\nu_p$ ) and Grüneisen parameter ( $\gamma$ ).

| Sample                                                 | Longitudinal sound velocity (m s <sup>-1</sup> ) | Transverse sound velocity (m s <sup>-1</sup> ) | Average sound velocity (m s <sup>-1</sup> ) | Mean sound velocity (m s <sup>-1</sup> ) | $\kappa_{min}$ (W m <sup>-1</sup> K <sup>-1</sup> ) | $\kappa_{diff}$ (W m <sup>-1</sup> K <sup>-1</sup> ) | $\nu_p$ | $\gamma$ |
|--------------------------------------------------------|--------------------------------------------------|------------------------------------------------|---------------------------------------------|------------------------------------------|-----------------------------------------------------|------------------------------------------------------|---------|----------|
| $(\text{BiSe})_{1.23}\text{CrSe}_2$<br>SPS $\parallel$ | 2234                                             | 1119                                           | 1255                                        | 1281                                     | 0.3                                                 | 0.2                                                  | 0.33    | 2        |
| $(\text{BiSe})_{1.23}\text{CrSe}_2$<br>SPS $\perp$     | 2406                                             | 1341                                           | 1493                                        | 1535                                     | 0.35                                                | 0.22                                                 | 0.27    | 1.6      |

**Table S3** Measured sound velocities of different misfit layered compounds.

| Sample                                                                                    | Longitudinal sound velocities (ms <sup>-1</sup> ) | Transverse sound velocities (ms <sup>-1</sup> ) | Average sound velocity (ms <sup>-1</sup> ) | Anisotropic ratio | Reference |
|-------------------------------------------------------------------------------------------|---------------------------------------------------|-------------------------------------------------|--------------------------------------------|-------------------|-----------|
| (BiSe) <sub>1.23</sub> CrSe <sub>2</sub> SPS                                              | 2234                                              | 1119                                            | 1255                                       | ~1.2              | This work |
| (BiSe) <sub>1.23</sub> CrSe <sub>2</sub> SPS ⊥                                            | 2406                                              | 1341                                            | 1493                                       |                   |           |
| (LaS) <sub>1.14</sub> NbS <sub>2</sub> SPS                                                | 4550                                              | 1920                                            | 2170                                       | ~1.06             | 5         |
| (LaS) <sub>1.14</sub> NbS <sub>2</sub> SPS ⊥                                              | 3950                                              | 2060                                            | 2300                                       |                   |           |
| (La <sub>0.95</sub> S <sub>0.95</sub> ) <sub>1.14</sub> NbS <sub>2</sub> SPS              | 4890                                              | 2240                                            | 2530                                       | ~1.08             | 5         |
| (La <sub>0.95</sub> S <sub>0.95</sub> ) <sub>1.14</sub> NbS <sub>2</sub> SPS ⊥            | 4830                                              | 2420                                            | 2720                                       |                   |           |
| (PbS) <sub>1.18</sub> (TiS <sub>2</sub> ) <sub>2</sub>                                    | 3834                                              | 1120                                            | 1276                                       |                   | 6         |
| (BiS) <sub>1.2</sub> (TiS <sub>2</sub> ) <sub>2</sub>                                     | 3662                                              | 1350                                            | 1532                                       |                   | 7         |
| (BiS) <sub>1.2</sub> (Mg <sub>0.05</sub> Ti <sub>0.95</sub> S <sub>2</sub> ) <sub>2</sub> | 3596                                              | 1429                                            | 1619                                       |                   |           |

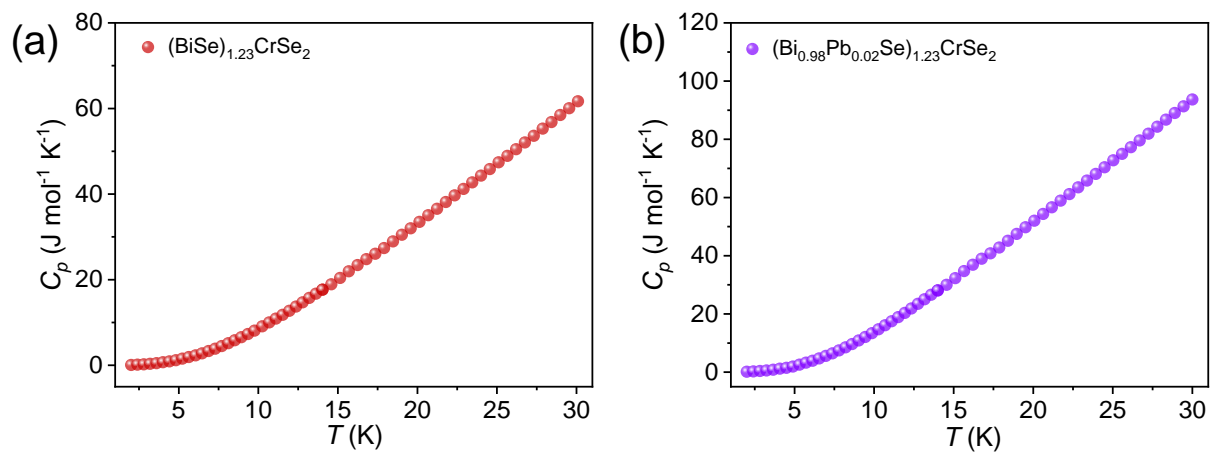

**Fig. S15** Low-temperature heat capacity of (a)  $(\text{BiSe})_{1.23}\text{CrSe}_2$  and (b)  $(\text{Bi}_{0.98}\text{Pb}_{0.02}\text{Se})_{1.23}\text{CrSe}_2$ .

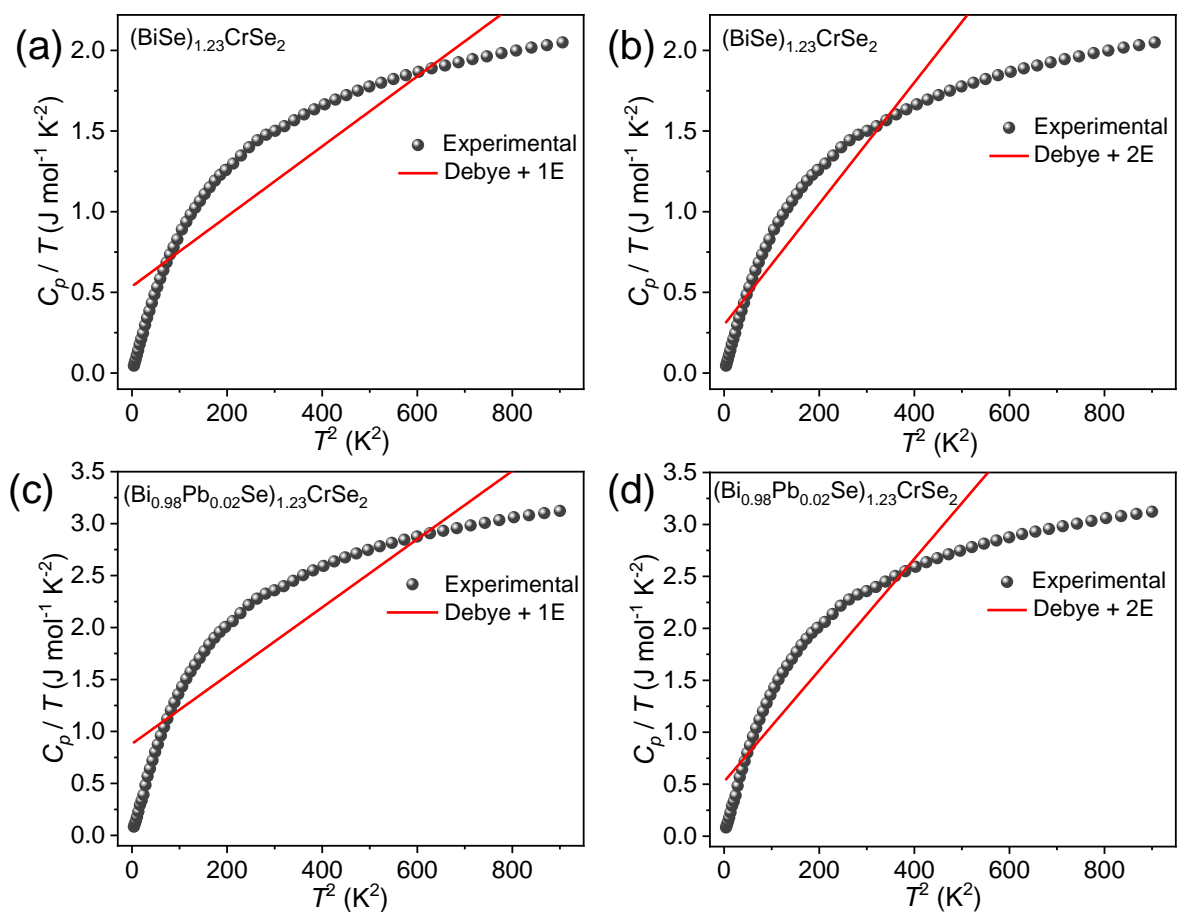

**Fig. S16** Low temperature experimental  $C_p/T$  vs  $T^2$  plot, fitted with the Debye-Einstein model, showing that more than two Einstein modes are required for reasonable fitting for Pristine (a-b) and Pb-doped  $(\text{BiSe})_{1.23}\text{CrSe}_2$  (c-d) MLC, respectively.

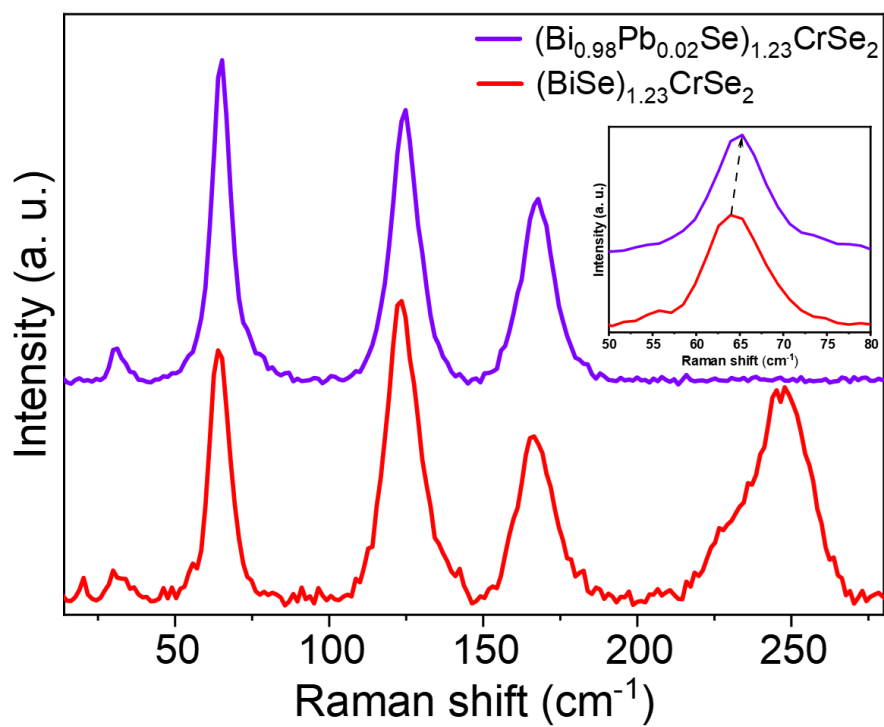

**Fig. S17** Room-temperature Raman spectra of (a) (BiSe)<sub>1.23</sub>CrSe<sub>2</sub> and (b) (Bi<sub>0.98</sub>Pb<sub>0.02</sub>Se)<sub>1.23</sub>CrSe<sub>2</sub>, inset showing the blue shift in peak position.

**Table S4** The parameters for  $(\text{BiSe})_{1.23}\text{CrSe}_2$  and  $(\text{Bi}_{0.98}\text{Pb}_{0.02}\text{Se})_{1.23}\text{CrSe}_2$  obtained by fitting the experimental  $C_p/T$  vs  $T^2$  data to a combined Debye-Einstein model.

| Parameters                                        | Derived values for<br>$(\text{BiSe})_{1.23}\text{CrSe}_2$ | Derived values for<br>$(\text{Bi}_{0.98}\text{Pb}_{0.02}\text{Se})_{1.23}\text{CrSe}_2$ |
|---------------------------------------------------|-----------------------------------------------------------|-----------------------------------------------------------------------------------------|
| $\gamma / \text{J mol}^{-1} \text{K}^{-2}$        | $0.05621 \pm 0.00377$                                     | $0.09337 \pm 0.00613$                                                                   |
| $\beta / 10^{-4} \text{J mol}^{-1} \text{K}^{-2}$ | $5.93035 \pm 0.453383$                                    | $7.7571 \pm 1.27049$                                                                    |
| $A_1 / \text{J mol}^{-1} \text{K}^{-1}$           | $4.02127 \pm 0.42074$                                     | $66.3243 \pm 9.64164$                                                                   |
| $\theta_{E1} / \text{K}$                          | $22.44317 \pm 0.77688$<br>(15.6 $\text{cm}^{-1}$ )        | $109.54025 \pm 7.75853$<br>(76.1 $\text{cm}^{-1}$ )                                     |
| $A_2 / \text{J mol}^{-1} \text{K}^{-1}$           | $26.49516 \pm 1.63767$                                    | $48.34531 \pm 3.91568$                                                                  |
| $\theta_{E2} / \text{K}$                          | $49.47666 \pm 1.45385$<br>(34.4 $\text{cm}^{-1}$ )        | $53.7527 \pm 2.01061$<br>(37.4 $\text{cm}^{-1}$ )                                       |
| $A_3 / \text{J mol}^{-1} \text{K}^{-1}$           | $44.42172 \pm 2.67093$                                    | $9.14094 \pm 1.06937$                                                                   |
| $\theta_{E3} / \text{K}$                          | $99.77767 \pm 4.00951$<br>(69.3 $\text{cm}^{-1}$ )        | $25.39153 \pm 0.86513$<br>(17.6 $\text{cm}^{-1}$ )                                      |
| $\theta_D / \text{K}$                             | $\sim 122$                                                | $\sim 87$                                                                               |
| $R^2$                                             | 0.99996                                                   | 0.99994                                                                                 |
| $\chi^2$                                          | 1.7564E-5                                                 | 6.54183E-5                                                                              |

**Table S5** Raman spectra fitting parameters for  $(\text{BiSe})_{1.23}\text{CrSe}_2$  and  $(\text{Bi}_{0.98}\text{Pb}_{0.02})_{1.23}\text{CrSe}_2$ , alongside the subsequently determined phonon lifetimes ( $\tau_i$ ). The corresponding goodness-of-fit ( $R^2$ ) values are 0.9856 and 0.9879.

| Sample                                                            | Raman Mode ( $\text{cm}^{-1}$ ) | FWHM ( $\text{cm}^{-1}$ ) | $\tau_i$ (ps) |
|-------------------------------------------------------------------|---------------------------------|---------------------------|---------------|
| $(\text{BiSe})_{1.23}\text{CrSe}_2$                               | 31.9                            | 11.98                     | 0.445         |
|                                                                   | 64.4                            | 7.75                      | 0.688         |
|                                                                   | 123.6                           | 11.78                     | 0.452         |
|                                                                   | 166.1                           | 13.04                     | 0.408         |
| $(\text{Bi}_{0.98}\text{Pb}_{0.02}\text{Se})_{1.23}\text{CrSe}_2$ | 31.01                           | 4.33                      | 1.225         |
|                                                                   | 69.99                           | 6.79                      | 0.782         |
|                                                                   | 124.48                          | 9.03                      | 0.589         |
|                                                                   | 167.75                          | 10.69                     | 0.497         |

**Table S6** Room-temperature lattice thermal conductivity ( $\kappa_L$ ), minimum lattice thermal conductivity ( $\kappa_L^{min}$ ) and phonon lifetime ( $\tau_i$ ) of low thermal conductivity, and a high thermal conductivity material, MoS<sub>2</sub>.

| Compound                                                                            | $\kappa_L$ at RT<br>(W m <sup>-1</sup> K <sup>-1</sup> ) | Measured<br>$\kappa_L^{min}$<br>(W m <sup>-1</sup> K <sup>-1</sup> ) | $\tau_i$<br>(ps) | Ref.      |
|-------------------------------------------------------------------------------------|----------------------------------------------------------|----------------------------------------------------------------------|------------------|-----------|
| (BiSe) <sub>1.23</sub> CrSe <sub>2</sub>                                            | ~ 0.52                                                   | ~ 0.52                                                               | 0.4 – 0.68       | This work |
| (Bi <sub>0.98</sub> Pb <sub>0.02</sub> Se) <sub>1.23</sub> CrSe <sub>2</sub>        | ~ 0.35                                                   | ~ 0.31                                                               | 0.49 – 1.22      | This work |
| TlCuZrSe <sub>3</sub>                                                               | ~ 0.88                                                   | ~ 0.41                                                               | 0.9 – 1.1        | 8         |
| Bi <sub>1.1</sub> Sb <sub>0.9</sub> Te <sub>2</sub> S                               | ~0.6                                                     | ~0.46                                                                | 0.3-1            | 9         |
| Cu <sub>1-x</sub> □ <sub>x</sub> Pb <sub>1-x</sub> Bi <sub>1+x</sub> S <sub>3</sub> | ~0.55                                                    | ~0.48                                                                | 0.41             | 10        |
| AgErTe <sub>2</sub>                                                                 | ~0.64                                                    | ~0.3                                                                 | 0.7              | 11        |
| Cu <sub>1.6</sub> Bi <sub>4.8</sub> S <sub>8</sub>                                  | ~ 0.71                                                   | ~ 0.44                                                               | 2 – 4.5          | 12        |
| WS <sub>1.8</sub> Se <sub>0.2</sub>                                                 | ~1                                                       | ~0.6                                                                 | 0.55-1.1         | 13        |
| Cs <sub>2</sub> SnI <sub>6</sub>                                                    | ~0.37                                                    | ~0.28                                                                | 1.04 – 1.83      | 14        |
| Cs <sub>2</sub> NaInCl <sub>6</sub>                                                 | ~0.43                                                    | ~0.43                                                                | 0.4-0.85         | 15        |
| Cs <sub>3</sub> Bi <sub>2</sub> I <sub>6</sub> Cl <sub>3</sub>                      | ~0.2                                                     | ~0.2                                                                 | 0.5 – 1          | 16        |
| MoS <sub>2</sub>                                                                    | ~23.2                                                    | -                                                                    | 38               | 17        |

## References

- 1 S. M. Clarke and D. E. Freedman, *Inorg. Chem.*, 2015, **54**, 2765–2771.
- 2 U. Myler and P. J. Simpson, *Phys. Rev. B*, 1997, **56**, 14303–14309.
- 3 <https://www.webelements.com>. (accessed 14 Feb 2026).
- 4 Q. Lu, *ACS Nano*, 2024, **18**, 13973–13982.
- 5 P. Jood, M. Ohta, O. I. Lebedev and D. Berthebaud, *Chem. Mater.*, 2015, **27**, 7719–7728.
- 6 C. Wan, Y. Wang, N. Wang and K. Koumoto, *Materials*, 2010, **3**, 2606–2617.
- 7 Y. E. Putri, C. Wan, Y. Wang, W. Norimatsu, M. Kusunoki and K. Koumoto, *Scr. Mater.*, 2012, **66**, 895–898.
- 8 R. K. Rohj, A. Bhui, S. Sett, A. Ghosh, K. Biswas and D. D. Sarma, *Chem. Mater.*, 2025, **37**, 520–529.
- 9 R. Pathak, P. Dutta, A. Srivastava, D. Rawat, R. K. Gopal, A. K. Singh, A. Soni and K. Biswas, *Angew. Chem. Int. Ed.*, 2024, **63**, e202408908.
- 10 V. Carnevali, S. Mukherjee, D. J. Voneshen, K. Maji, E. Guilmeau, A. V. Powell, P. Vaqueiro and M. Fornari, *J. Am. Chem. Soc.*, 2023, **145**, 9313–9325.
- 11 D. Sarkar, S. Shahabfar, Y. Liu, P. Yanda, T. S. Ie, H. Zhao, P. Nandi, K. R. Pradeep, C. Shekhar, C. Felser, V. P. Dravid, C. M. Wolverton and M. G. Kanatzidis, *J. Am. Chem. Soc.*, 2025, **147**, 46483–46496.
- 12 A. Bhui, M. Dutta, M. Mukherjee, K. S. Rana, A. K. Singh, A. Soni and K. Biswas, *Chem. Mater.*, 2021, **33**, 2993–3001.
- 13 M. T. V. Vijay, J. Archana, M. Navaneethan and K. D. Nisha, *Surfaces and Interfaces*, 2025, **72**, 106905.
- 14 A. Bhui, T. Ghosh, K. Pal, K. Singh Rana, K. Kundu, A. Soni and K. Biswas, *Chem. Mater.*, 2022, **34**, 3301–3310.
- 15 G. Wang, J. Zheng, J. Xue, Y. Xu, Q. Zheng, G. Hautier, H. Lu and Y. Zhou, *Adv. Sci.* 2025, **12**, 2408149.
- 16 P. Acharyya, T. Ghosh, K. Pal, K. S. Rana, M. Dutta, D. Swain, M. Etter, A. Soni, U. V. Waghmare and K. Biswas, *Nat. Commun.*, 2022, **13**, 5053.
- 17 Y. Cai, J. Lan, G. Zhang and Y. W. Zhang, *Phys. Rev. B*, 2014, **89**, 035438.
